# Supplementary material
Source: PubMed Central journal article supplement (PMC6986895)
Supplement: EMS85492-supplement-Supplementary_information.pdf [file EMS85492-supplement-Supplementary_information.pdf]

Supplementary information:

| <b>model 1</b>              |                                    |      | % of missing data |       |       |       |       |        |        |       |
|-----------------------------|------------------------------------|------|-------------------|-------|-------|-------|-------|--------|--------|-------|
|                             | <i>expected</i>                    | 0%   | 1%                | 5%    | 10%   | 20%   | 30%   | 40%    | 50%    |       |
|                             | <i>number of complete families</i> | 500  | 486.4             | 434.4 | 374.7 | 271.9 | 189.8 | 125.8  | 77.8   |       |
| without multiple imputation | <i>GRR2</i>                        | 1    | 0.006             | 0.006 | 0.007 | 0.008 | 0.008 | 0.001  | 0.010  | 0.040 |
|                             | <i>GRR3</i>                        | 1.5  | 0.007             | 0.006 | 0.006 | 0.006 | 0.007 | -0.009 | -0.005 | 0.053 |
|                             | <i>coverage 2</i>                  | 0.95 | 0.938             | 0.940 | 0.930 | 0.946 | 0.936 | 0.942  | 0.966  | 0.960 |
|                             | <i>coverage 3</i>                  | 0.95 | 0.928             | 0.924 | 0.926 | 0.940 | 0.948 | 0.958  | 0.954  | 0.966 |
| with multiple imputation    | <i>GRR2</i>                        | 1    | 0.006             | 0.007 | 0.012 | 0.018 | 0.033 | 0.055  | 0.096  | 0.154 |
|                             | <i>GRR3</i>                        | 1.5  | 0.007             | 0.008 | 0.013 | 0.015 | 0.022 | 0.027  | 0.036  | 0.045 |
|                             | <i>coverage 2</i>                  | 0.95 | 0.938             | 0.936 | 0.938 | 0.934 | 0.928 | 0.932  | 0.906  | 0.843 |
|                             | <i>coverage 3</i>                  | 0.95 | 0.928             | 0.928 | 0.936 | 0.936 | 0.928 | 0.922  | 0.926  | 0.896 |

  

| <b>model 2</b>              |                                    |      | % of missing data |        |       |       |       |       |        |       |
|-----------------------------|------------------------------------|------|-------------------|--------|-------|-------|-------|-------|--------|-------|
|                             | <i>expected</i>                    | 0%   | 1%                | 5%     | 10%   | 20%   | 30%   | 40%   | 50%    |       |
|                             | <i>number of complete families</i> | 500  | 486.2             | 434.3  | 374.6 | 272.1 | 189.5 | 125.2 | 78.4   |       |
| without multiple imputation | <i>GRR2</i>                        | 1.5  | 0.008             | 0.007  | 0.010 | 0.014 | 0.017 | 0.019 | 0.015  | 0.008 |
|                             | <i>GRR3</i>                        | 1.5  | -0.001            | -0.002 | 0.000 | 0.006 | 0.004 | 0.006 | -0.006 | 0.000 |
|                             | <i>coverage 2</i>                  | 0.95 | 0.960             | 0.958  | 0.960 | 0.956 | 0.952 | 0.962 | 0.976  | 0.958 |
|                             | <i>coverage 3</i>                  | 0.95 | 0.962             | 0.952  | 0.958 | 0.960 | 0.952 | 0.948 | 0.962  | 0.952 |
| with multiple imputation    | <i>GRR2</i>                        | 1.5  | 0.008             | 0.009  | 0.014 | 0.020 | 0.036 | 0.054 | 0.084  | 0.129 |
|                             | <i>GRR3</i>                        | 1.5  | -0.001            | 0.001  | 0.006 | 0.012 | 0.017 | 0.023 | 0.021  | 0.018 |
|                             | <i>coverage 2</i>                  | 0.95 | 0.960             | 0.954  | 0.952 | 0.952 | 0.950 | 0.948 | 0.942  | 0.910 |
|                             | <i>coverage 3</i>                  | 0.95 | 0.962             | 0.958  | 0.954 | 0.968 | 0.958 | 0.960 | 0.928  | 0.938 |

  

| <b>model 3</b>              |                                    |      | % of missing data |       |       |       |       |       |       |       |
|-----------------------------|------------------------------------|------|-------------------|-------|-------|-------|-------|-------|-------|-------|
|                             | <i>expected</i>                    | 0%   | 1%                | 5%    | 10%   | 20%   | 30%   | 40%   | 50%   |       |
|                             | <i>number of complete families</i> | 500  | 486.7             | 434.3 | 374.6 | 271.6 | 188.6 | 126.4 | 77.6  |       |
| without multiple imputation | <i>GRR2</i>                        | 1.5  | 0.009             | 0.008 | 0.007 | 0.007 | 0.015 | 0.016 | 0.001 | 0.045 |
|                             | <i>GRR3</i>                        | 1.5  | 0.003             | 0.002 | 0.004 | 0.005 | 0.011 | 0.014 | 0.023 | 0.096 |
|                             | <i>coverage 2</i>                  | 0.95 | 0.922             | 0.924 | 0.912 | 0.938 | 0.940 | 0.942 | 0.932 | 0.964 |
|                             | <i>coverage 3</i>                  | 0.95 | 0.934             | 0.930 | 0.932 | 0.930 | 0.938 | 0.940 | 0.940 | 0.954 |
| with multiple imputation    | <i>GRR2</i>                        | 1.5  | 0.009             | 0.010 | 0.015 | 0.023 | 0.040 | 0.068 | 0.116 | 0.179 |
|                             | <i>GRR3</i>                        | 1.5  | 0.003             | 0.005 | 0.009 | 0.015 | 0.022 | 0.032 | 0.049 | 0.058 |
|                             | <i>coverage 2</i>                  | 0.95 | 0.922             | 0.920 | 0.916 | 0.922 | 0.924 | 0.918 | 0.898 | 0.830 |
|                             | <i>coverage 3</i>                  | 0.95 | 0.934             | 0.934 | 0.938 | 0.936 | 0.924 | 0.930 | 0.922 | 0.904 |

  

| <b>model 4</b>              |                                    |      | % of missing data |       |        |        |       |       |       |       |
|-----------------------------|------------------------------------|------|-------------------|-------|--------|--------|-------|-------|-------|-------|
|                             | <i>expected</i>                    | 0%   | 1%                | 5%    | 10%    | 20%    | 30%   | 40%   | 50%   |       |
|                             | <i>number of complete families</i> | 500  | 486.1             | 433.6 | 375.2  | 272.9  | 189.6 | 125.6 | 78.1  |       |
| without multiple imputation | <i>GRR2</i>                        | 1.5  | 0.012             | 0.013 | 0.009  | 0.016  | 0.017 | 0.039 | 0.070 | 0.285 |
|                             | <i>GRR3</i>                        | 1.5  | -0.002            | 0.000 | -0.007 | -0.001 | 0.006 | 0.010 | 0.056 | 0.247 |
|                             | <i>coverage 2</i>                  | 0.95 | 0.946             | 0.958 | 0.962  | 0.974  | 0.956 | 0.942 | 0.950 | 0.966 |
|                             | <i>coverage 3</i>                  | 0.95 | 0.958             | 0.956 | 0.956  | 0.956  | 0.960 | 0.970 | 0.968 | 0.952 |
| with multiple imputation    | <i>GRR2</i>                        | 1.5  | 0.012             | 0.014 | 0.016  | 0.025  | 0.036 | 0.050 | 0.084 | 0.137 |
|                             | <i>GRR3</i>                        | 1.5  | -0.002            | 0.000 | 0.003  | 0.010  | 0.014 | 0.008 | 0.015 | 0.033 |
|                             | <i>coverage 2</i>                  | 0.95 | 0.946             | 0.944 | 0.954  | 0.954  | 0.964 | 0.956 | 0.948 | 0.922 |
|                             | <i>coverage 3</i>                  | 0.95 | 0.958             | 0.954 | 0.964  | 0.960  | 0.970 | 0.958 | 0.948 | 0.934 |

Supplementary table 1: Bias and coverage of genetic parameter estimates from one-locus simulation study as a function of the percentage of missing data. The average number of informative families for the analysis without MI is noted on the third row.

|              | haplotype frequencies |     |      |      | number of families |
|--------------|-----------------------|-----|------|------|--------------------|
|              | 11                    | 12  | 21   | 22   |                    |
| population1  | 0.5                   | 0.1 | 0.25 | 0.15 | 100                |
| population 2 | 0.2                   | 0.3 | 0.3  | 0.2  | 400                |

Supplementary table 2: Haplotype frequencies for simulations under population stratification

Supplementary Figure 1: LD pattern between the five loci considered in the simulations. Gradation of greys represents the level of the  $r^2$  and numbers are the  $D'$  values. This LD pattern is similar to the one observed in the CTLA4 gene in a sample of 450 multiple sclerosis trios [23].

Supplementary Figure 2: Correlation plot between the logarithm of the p-value obtained on the complete data file and data with 5, 30 and 50% of missing data when using MI approach on the recessive model 1 (a, b and c respectively) and the dominant model 2 (d, e and f) with genotype relative risks 1.5. For a better understanding of these graphs, the linear equation  $y=x$  has been plotted.

Supplementary Figure 3: Correlation plot between the genotype relative risk of the homozygous 2/2 obtained on the complete data file and data with 5, 30 and 50% of missing data when using MI approach on the recessive model 1 (a, b and c respectively) and the dominant model 2 (d, e and f) with genotype relative risk 1.5. For a better understanding of these graph, the linear equation  $y=x$  has been plotted.

Supplementary Figure 4: mean difference between the true p-value from complete datasets and p-values obtained by TRANSMIT or conditional logistic regression when using or not MI approach from datasets with different levels of missing data.

Supplementary Figure 5: Type one error rate obtained at  $\alpha=0.05$  on data simulated under population stratification as a function of the percentage of missing data when using TRANSMIT program or conditional logistic regression with or without MI.

Supplementary information, figure1

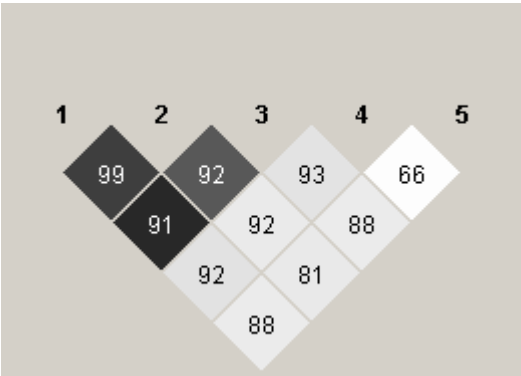

a.

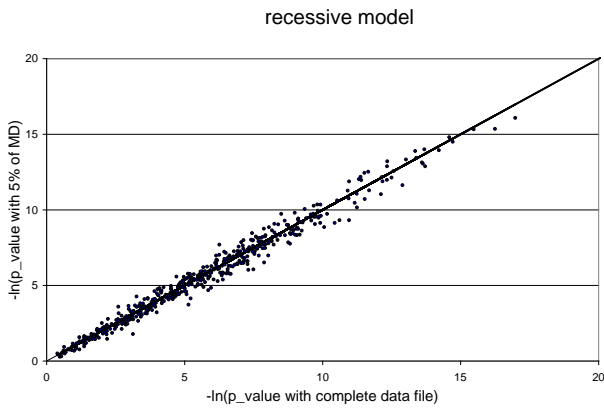

d.

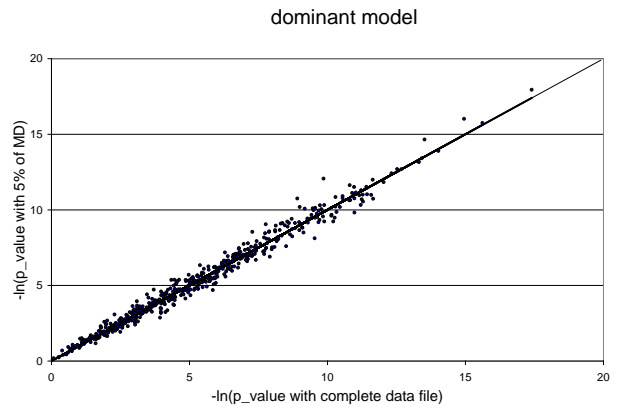

b.

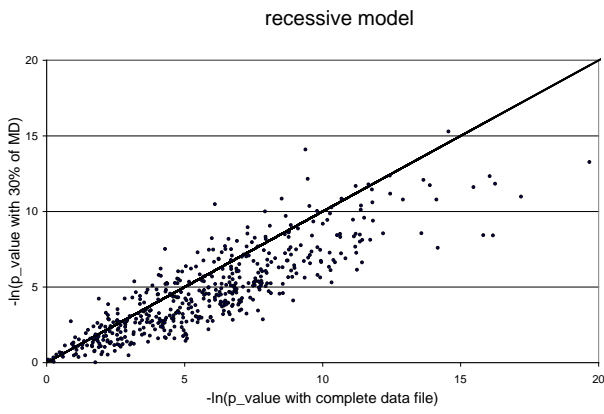

e.

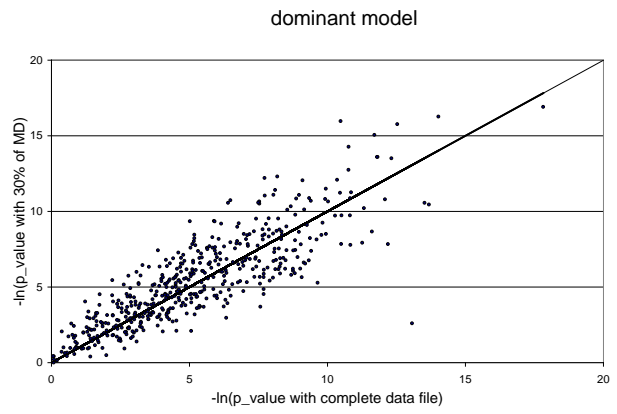

c.

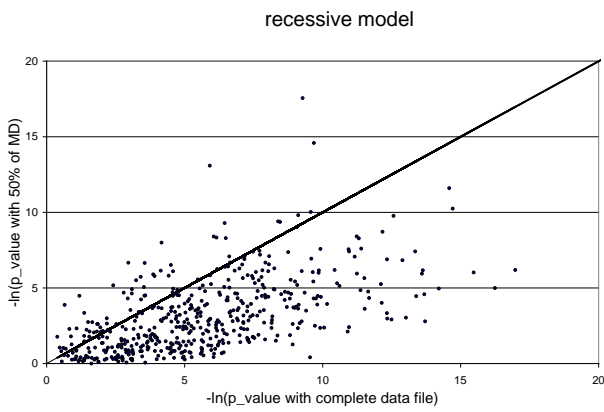

f.

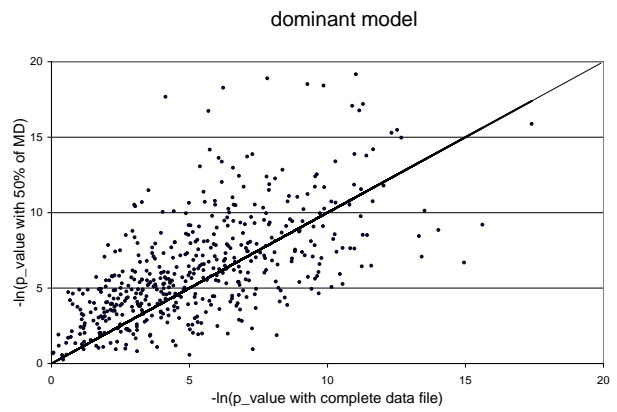

Supplementary information, figure 2

a

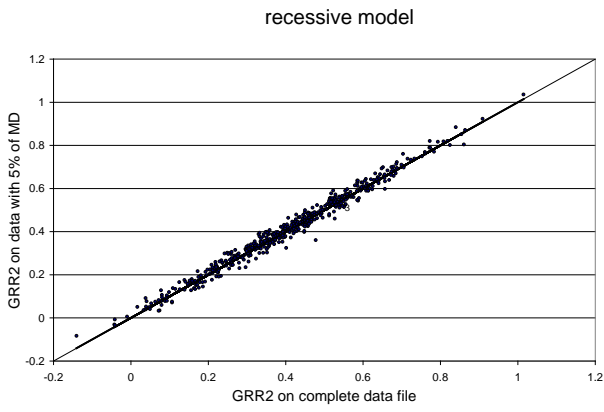

d

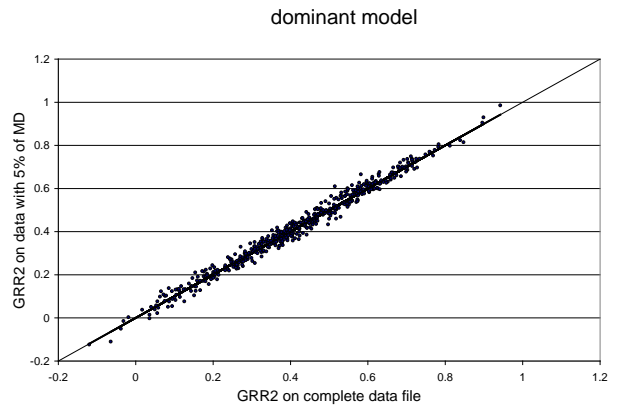

b

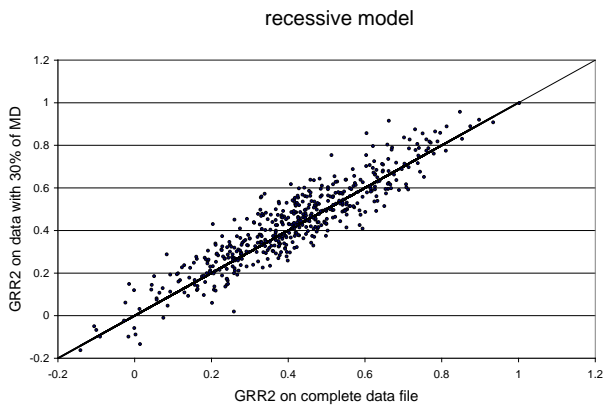

e

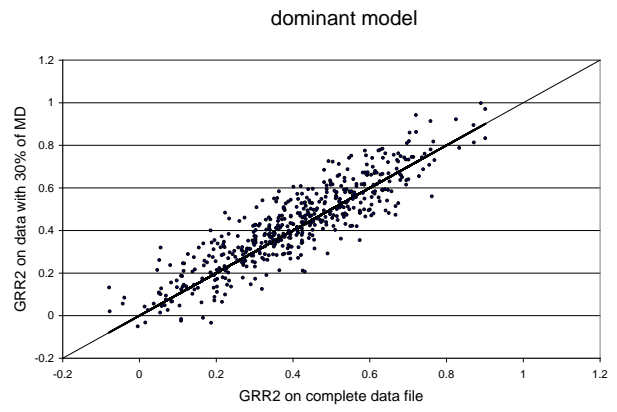

c

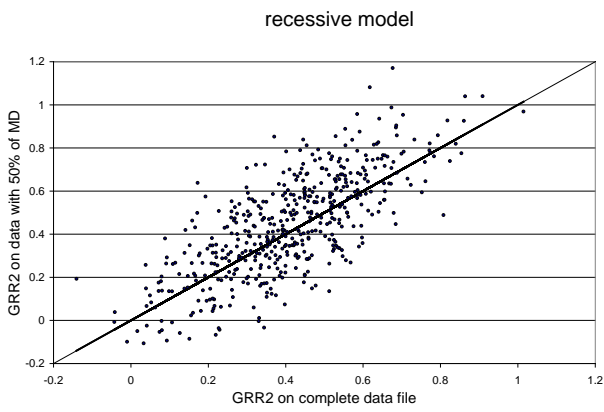

f

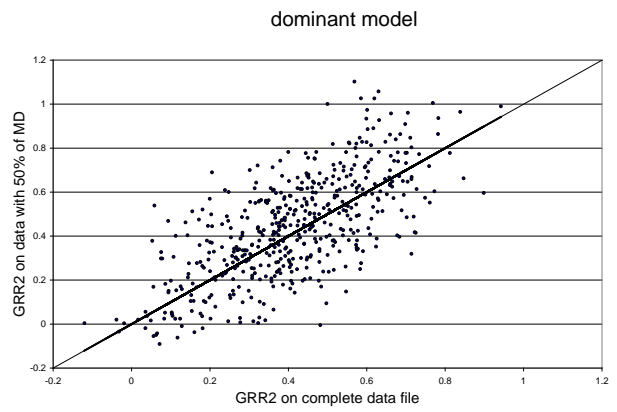

Supplementary information, figure 3

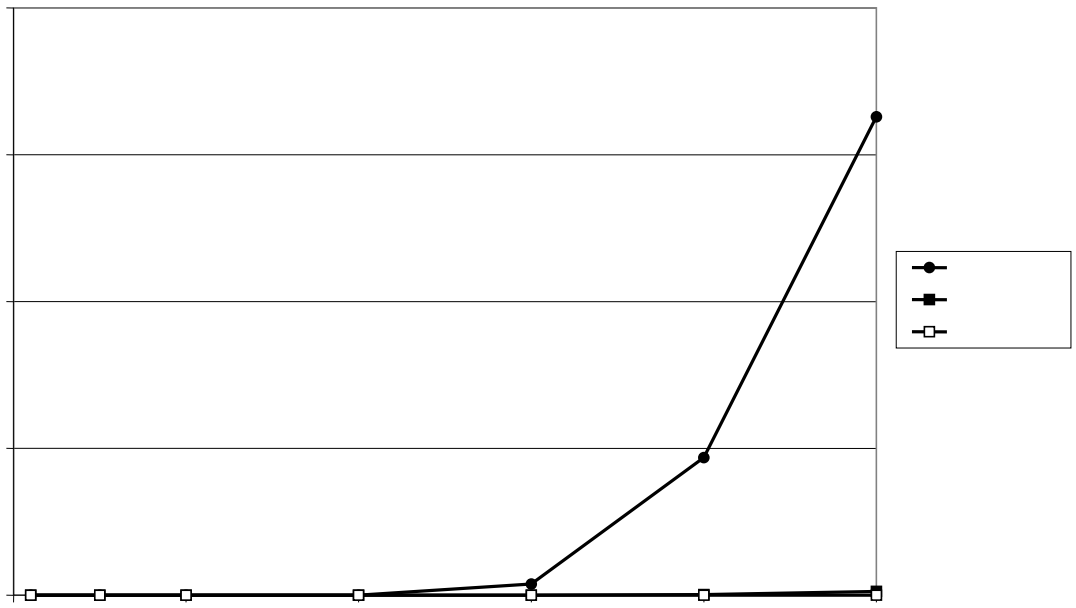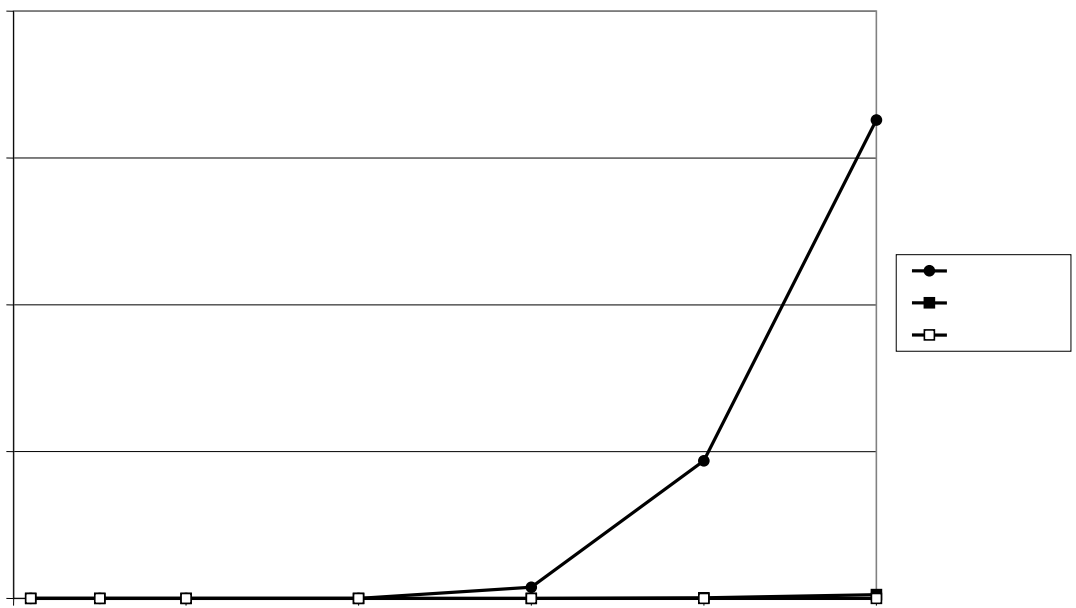

Supplementary information, figure 4

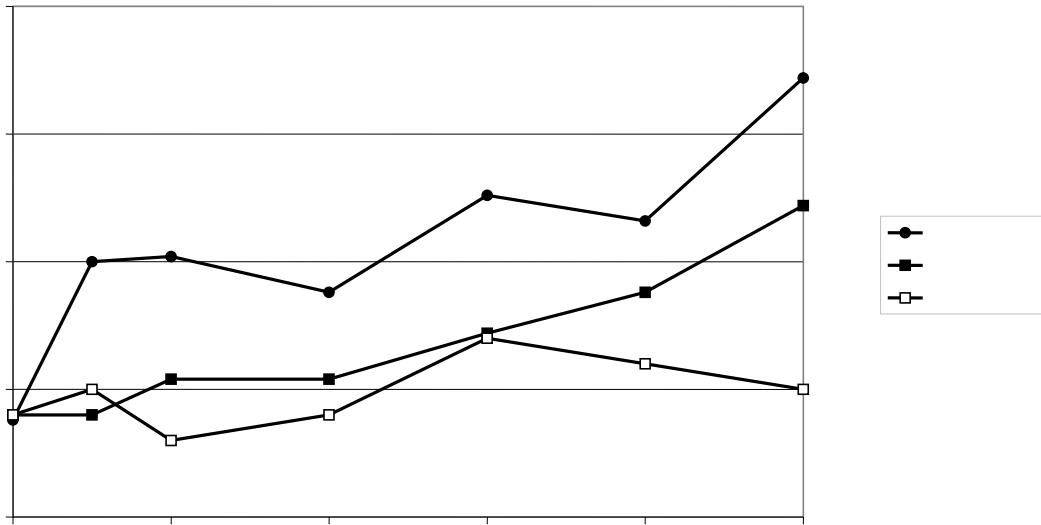

Supplementary information, figure 5
